# Supplementary material
Source: Springer Nature journal article supplement (https://www.springermedizin.de/resource/supplementary/12933_2011_419_MOESM2_ESM.pdf/9538130)

**A**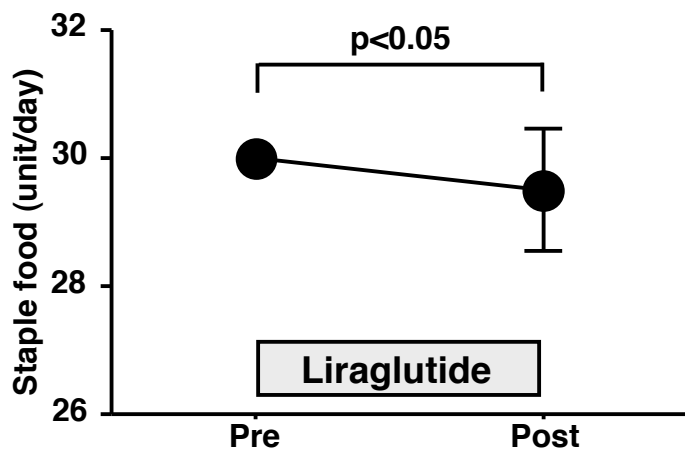**B**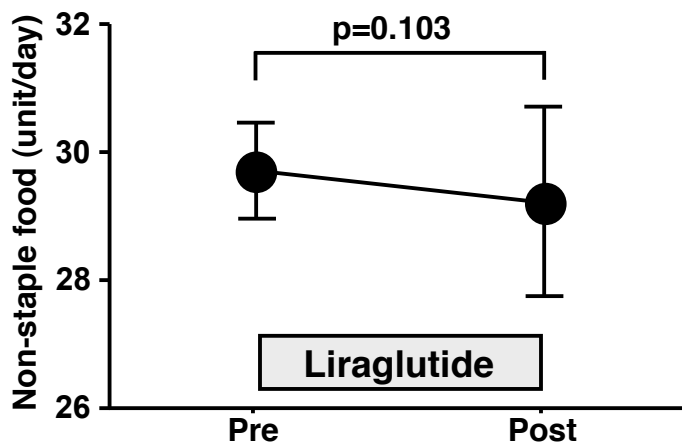**C**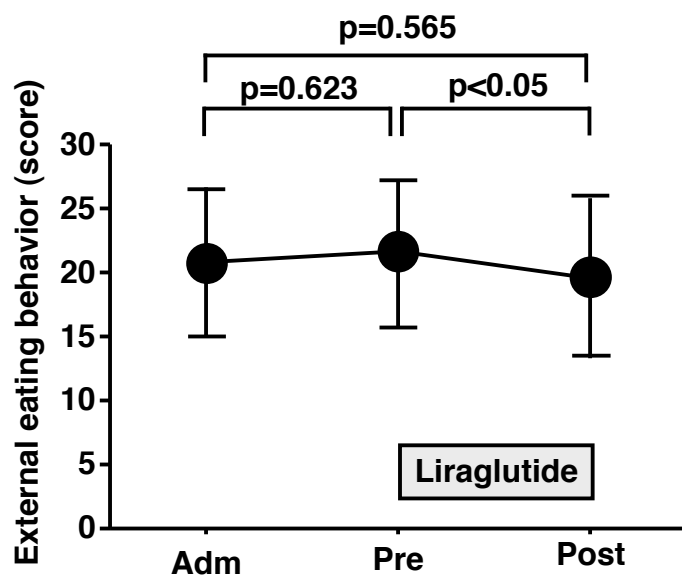**D**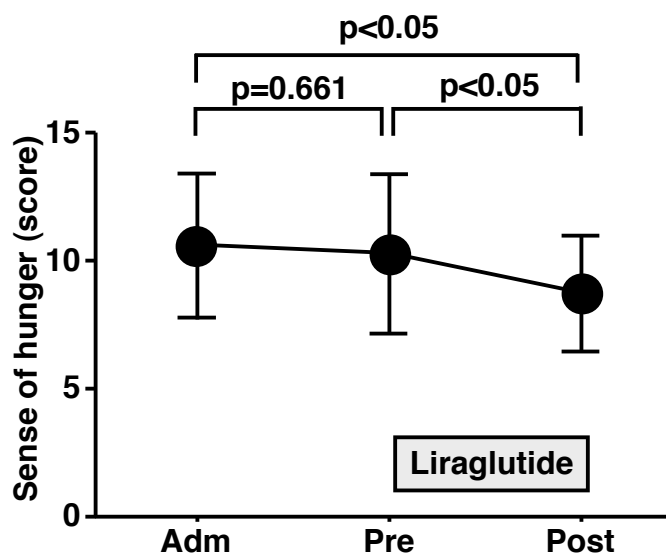**E**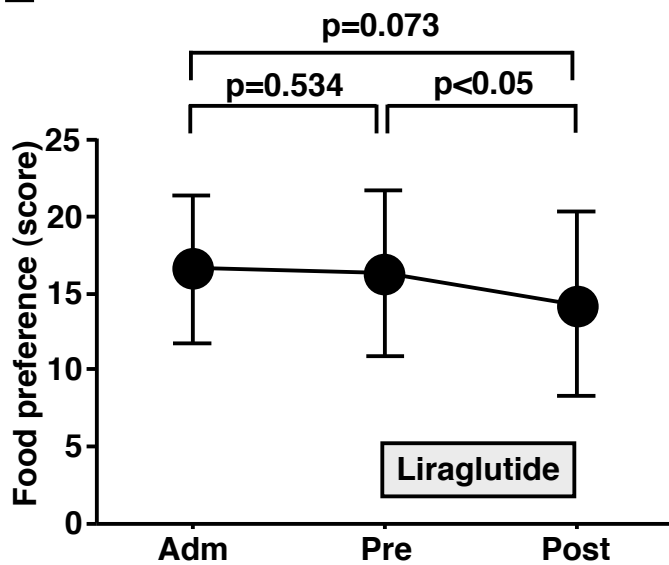**F**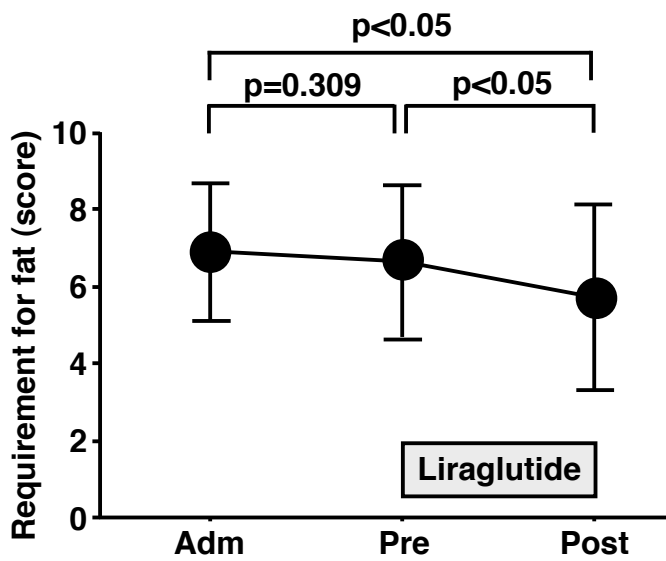

Supplement: MOESM2 [file 9538130]
